# Supplementary material for: Synthesis of metapristone through an efficient N-demethylation of mifepristone
Source: Royal Society of Chemistry journal article supplement (doi:10.1039/c5ra26557f), 2016-01-01
Supplement: c5ra26557f1.pdf [file c5ra26557f1.pdf]

## Supporting Information

### Synthesis of Metapristone through an Efficient *N*-Demethylation of Mifepristone

Jianlei Wu,<sup>1</sup> Xuemei Yu,<sup>1</sup> Jian Liu, Yuqi Lin, Yu Gao, Lee Jia, Haijun Chen\*

College of Chemistry, Fuzhou University, Fuzhou, Fujian 350116, China

<sup>1</sup>These authors contribute equally to this work.

Corresponding authors:

\*Haijun Chen, PhD

College of Chemistry

Fuzhou University

Fuzhou, Fujian 350116, China

Fax: +86 591 22866227

Tel: +86 591 22866234

Email: [chenhaij@gmail.com](mailto:chenhaij@gmail.com)

### Table of Contents

1. Copies of <sup>1</sup>H and <sup>13</sup>C NMR spectra of RU-42633 (Metapristone) S2
2. HRMS spectra of RU-42633 (Metapristone) S3
3. Photographic guide for synthesis of RU-42633 (Metapristone) S4 – S5

# 1. Copies of $^1\text{H}$ and $^{13}\text{C}$ NMR spectra of RU-42633

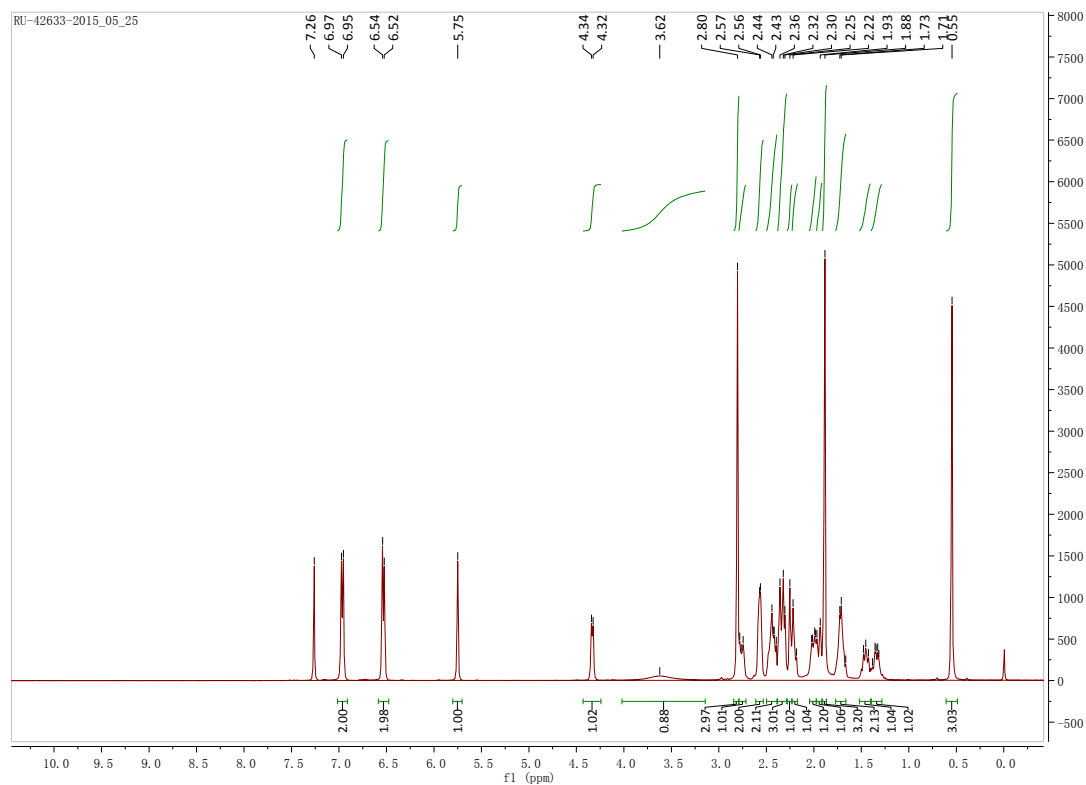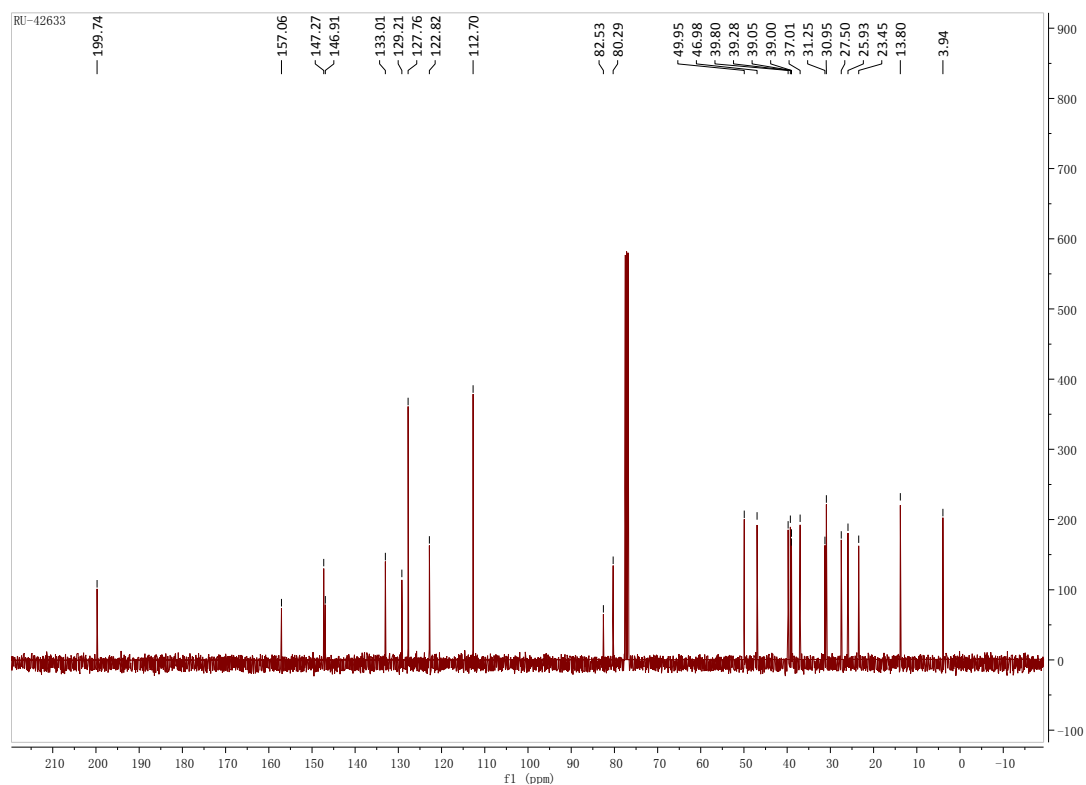

## 2. HRMS spectra of RU-42633

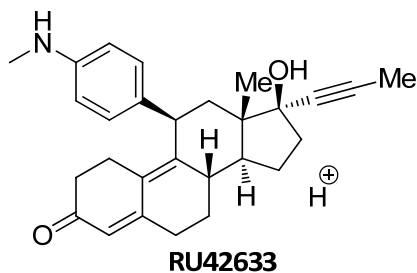

Chemical Formula:  $C_{28}H_{34}NO_2^+$

Exact Mass: 416.2584

Found: 416.2589

RV-42633 #761-777 RT: 1.78-1.82 AV: 17 NL: 2.11E8  
T: FTMS + p ESI Full ms [200.00-700.00]

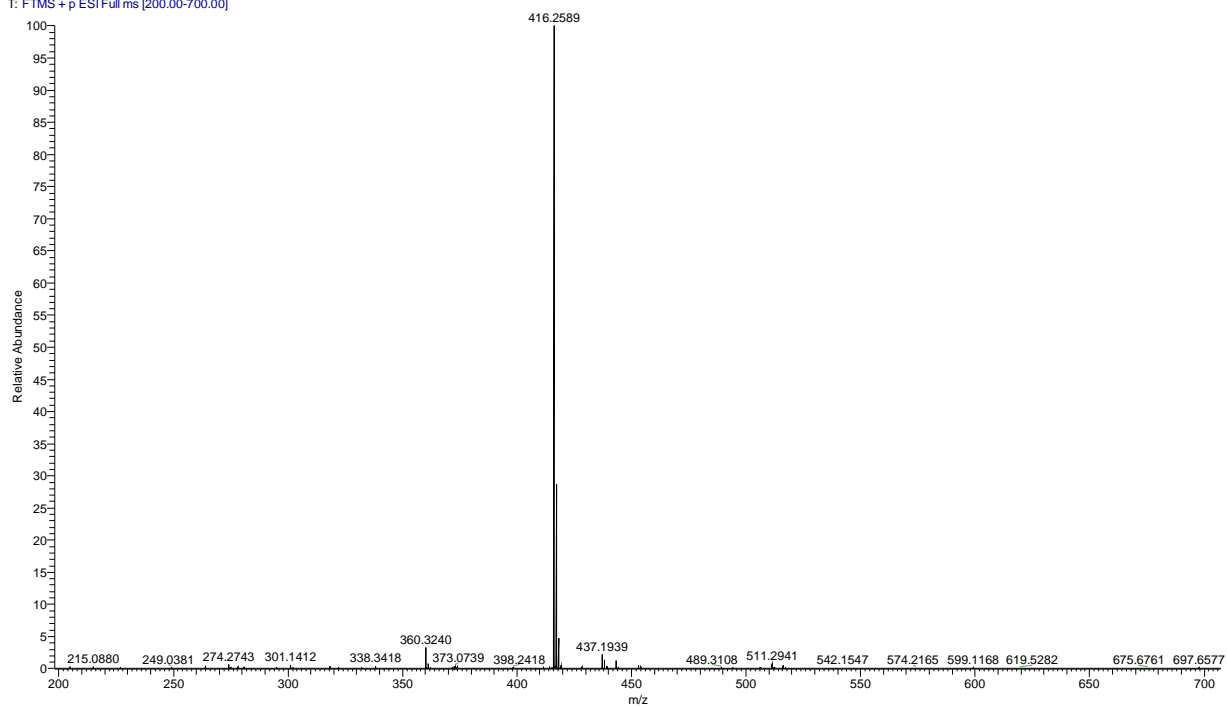

### 3. Photographic guide for the synthesis of RU-42633 (grams scale)

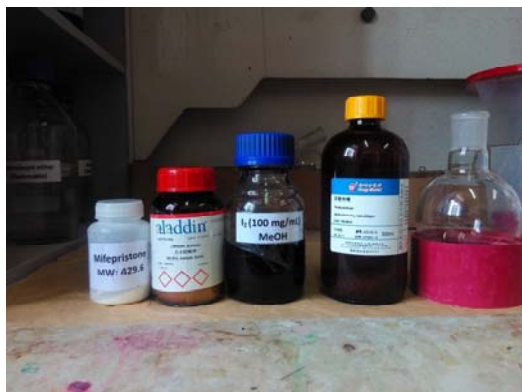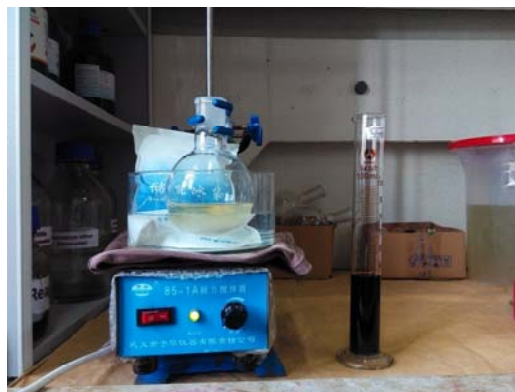

**Fig. S1.** Left: Materials and reagents. Right: To a solution of mifepristone (2.5 g) and LiOAc (1.92 g) in 90 mL THF was added I<sub>2</sub>/MeOH (46 mL) at 0 °C.

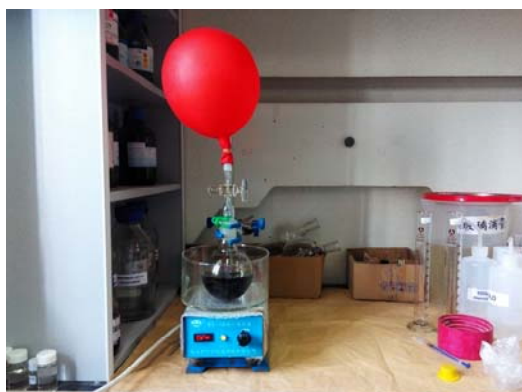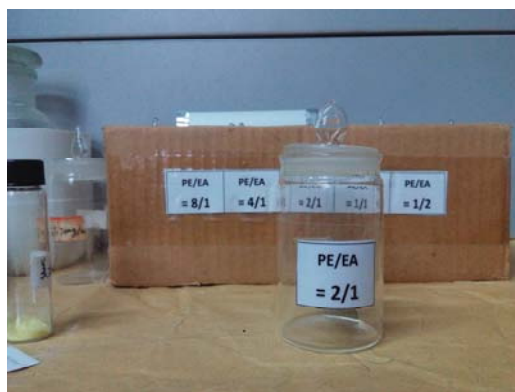

**Fig. S2.** Left: The reaction was stirred at r.t. under argon atmosphere. Right: The reaction was monitored by TLC (PE/EA = 2/1).

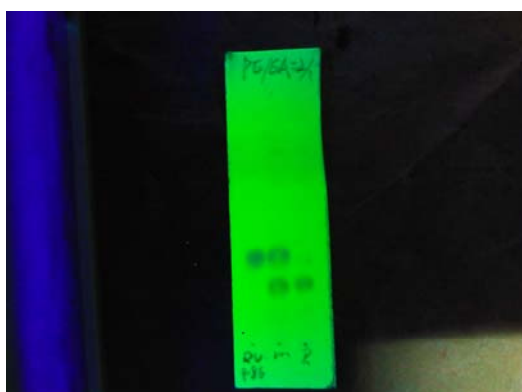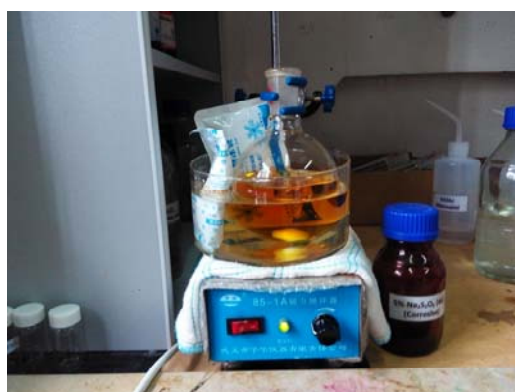

**Fig. S3.** Left: TLC plate, the reaction mixture was stirred for 24 h. Right: The reaction was quenched by 5% Na<sub>2</sub>S<sub>2</sub>O<sub>3</sub> (aq) at 0 °C.

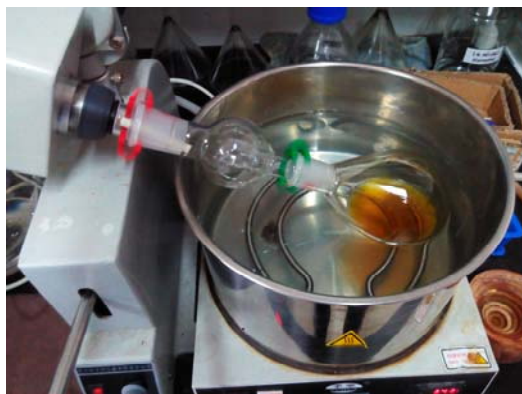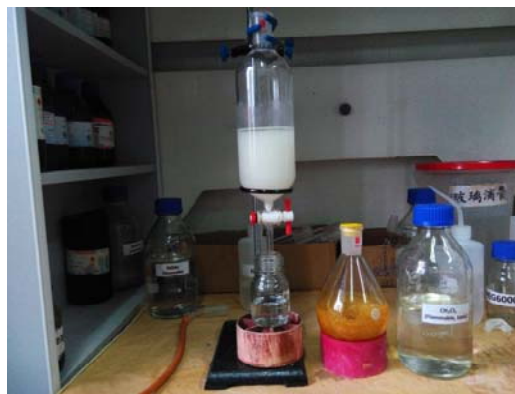

**Fig. S4.** Left: The organic layer was concentrated under reduced pressure after extraction (EA/H<sub>2</sub>O). Right: The crude product was dissolved by CH<sub>2</sub>Cl<sub>2</sub>.

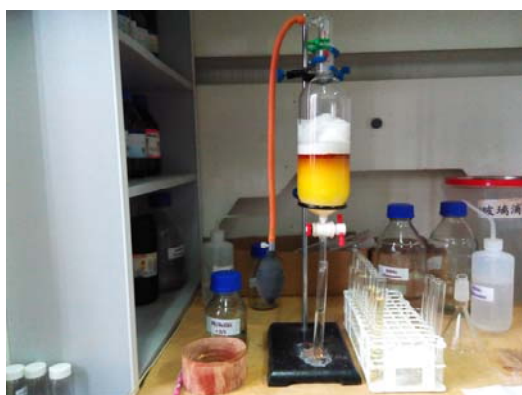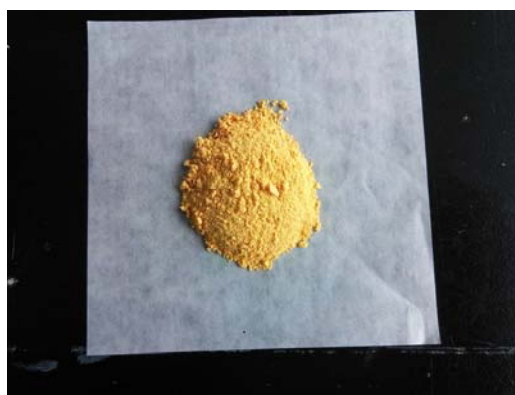

**Fig. S5.** Left: The residue was purified by a silica gel column (PE/EA = 1/1). Right: The desired product RU-42633 (2.22 g, 92% yield) was obtained as a yellow solid.
